# Supplementary material for: Biopriming of Momordica charantia Seeds with Enterobacter to Improve Nutritional and Biochemical Attributes
Source: Hindawi journal article supplement (doi:10.1155/2024/8012474), 2024-04-04
Supplement: f1 [file 8012474.f1.docx]

**Biopriming of *Momordica charantia* seeds with *Enterobacter* to improve nutritional and biochemical attributes**

**Shazia Anwer Bukhari1, Nabila Farah1, Ghulam Mustafa1*, Sibtain Ahmed2,3 and Mohammed Fahad Albeshr4**

***Supplementary Material***


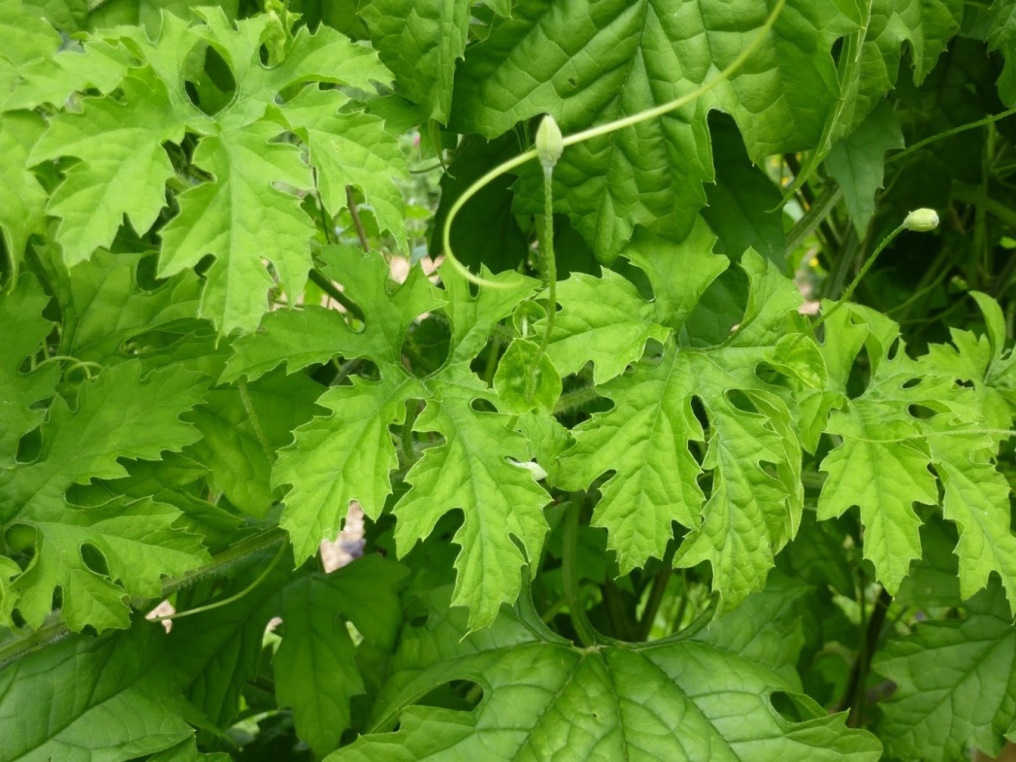


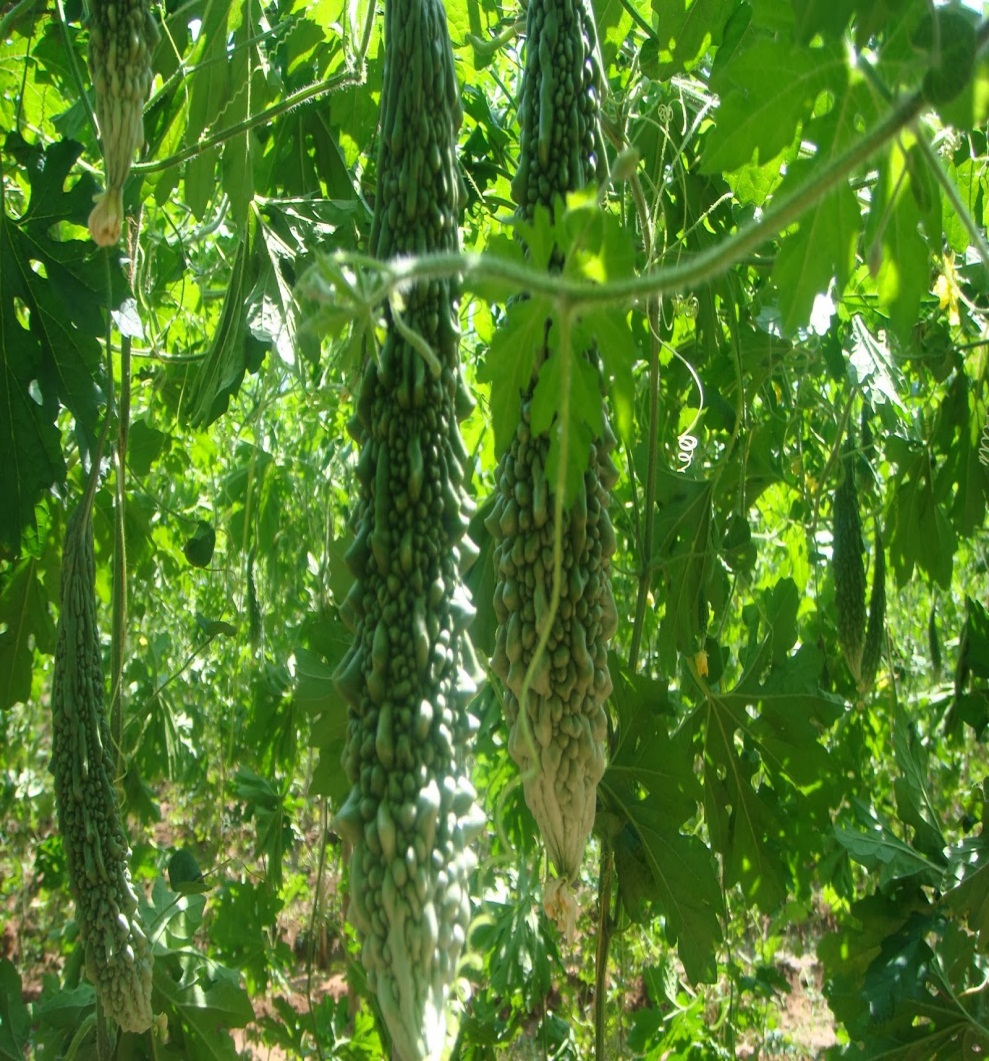


Figure S1: The plant phenotype after biopriming with *Enterobacter* spp. showing improved germination and growth


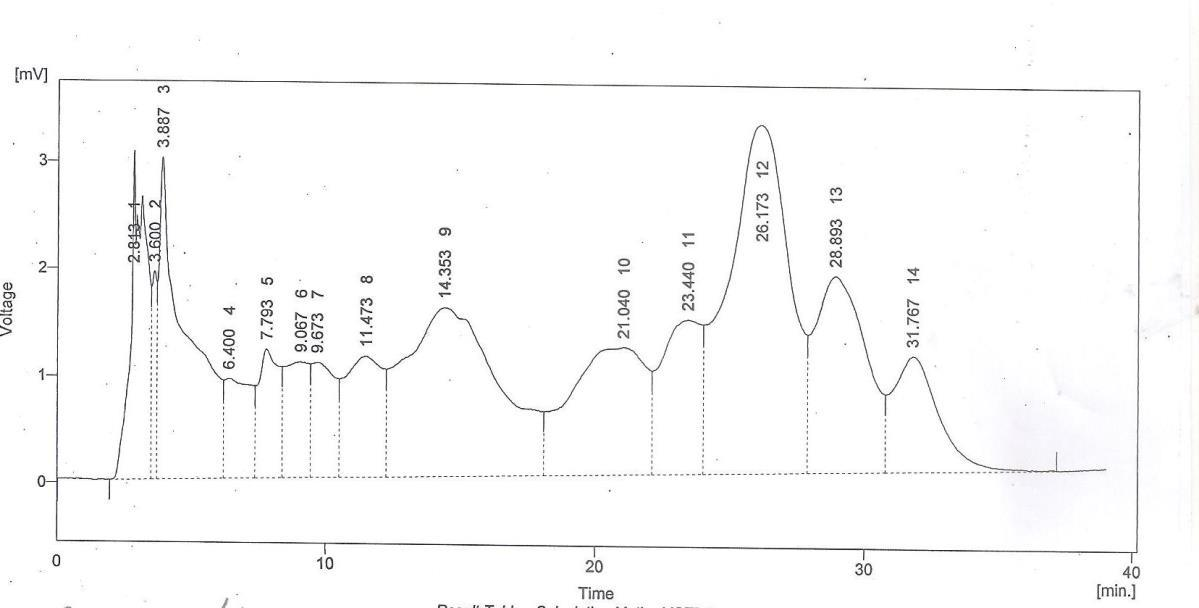


**(a)**


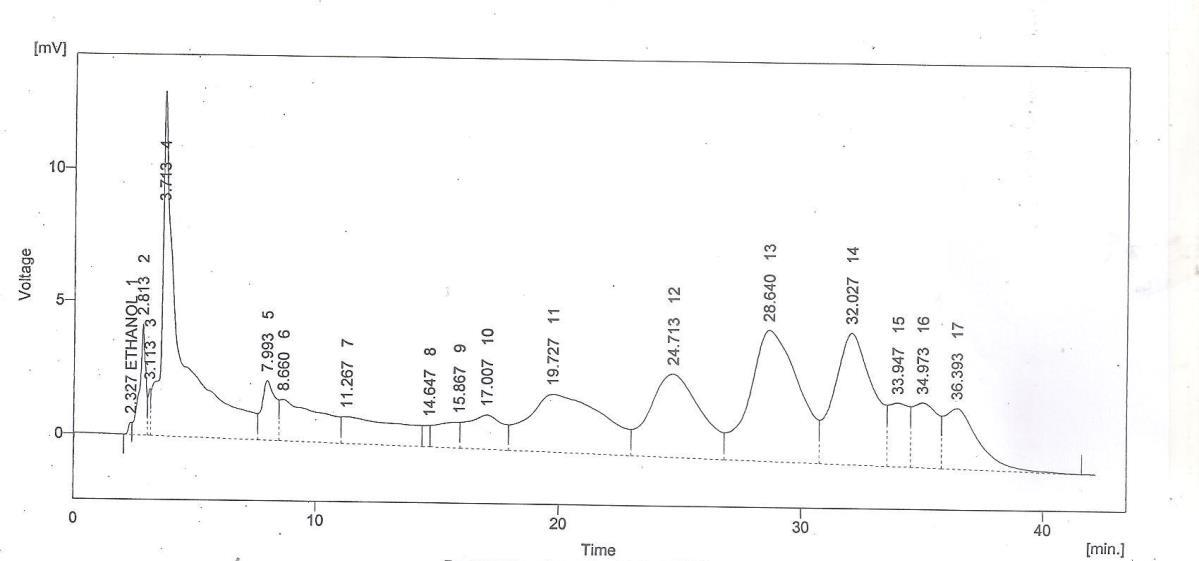


**(b)**

Figure S2: HPLC chromatograms of phenolic profile of *M. charantia* leaves. (a) after seed priming with *Enterobacter* strain FD 17, (b) control


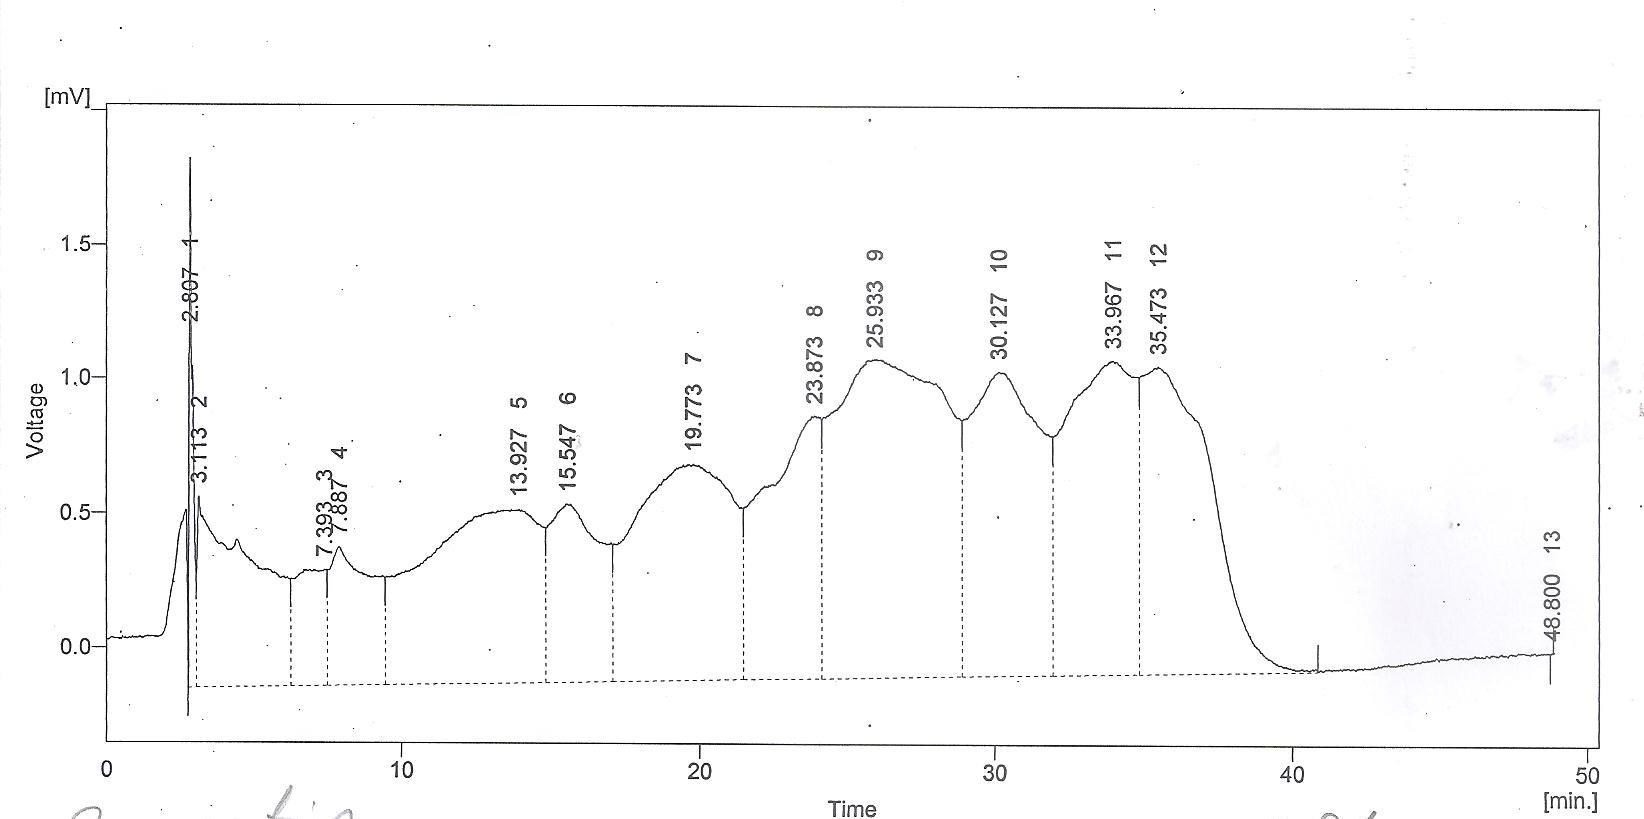


**(a)**


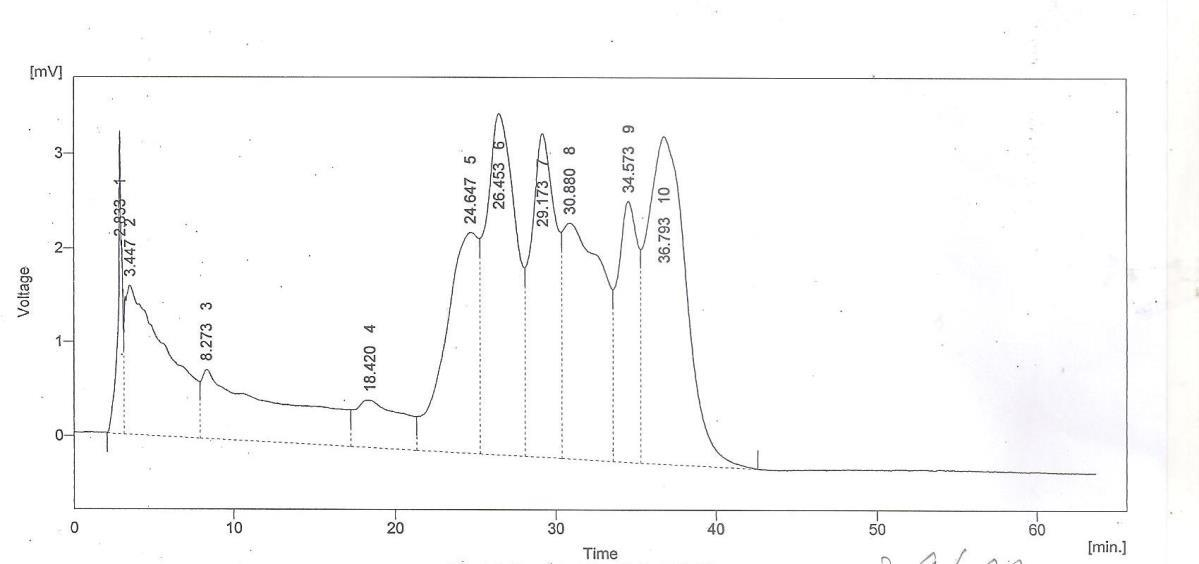


**(b)**

Figure S3: HPLC chromatograms of phenolic profile of *M. charantia* fruit. (a) after seed priming with *Enterobacter* strain FD 17, (b) control
